# Supplementary material
Source: PubMed Central journal article supplement (PMC4437529)
Supplement: NIHMS540734-supplement-Supp_Fig_S1-S3___Table_S1-S2.pdf [file NIHMS540734-supplement-Supp_Fig_S1-S3___Table_S1-S2.pdf]

## Supplementary Figure 1

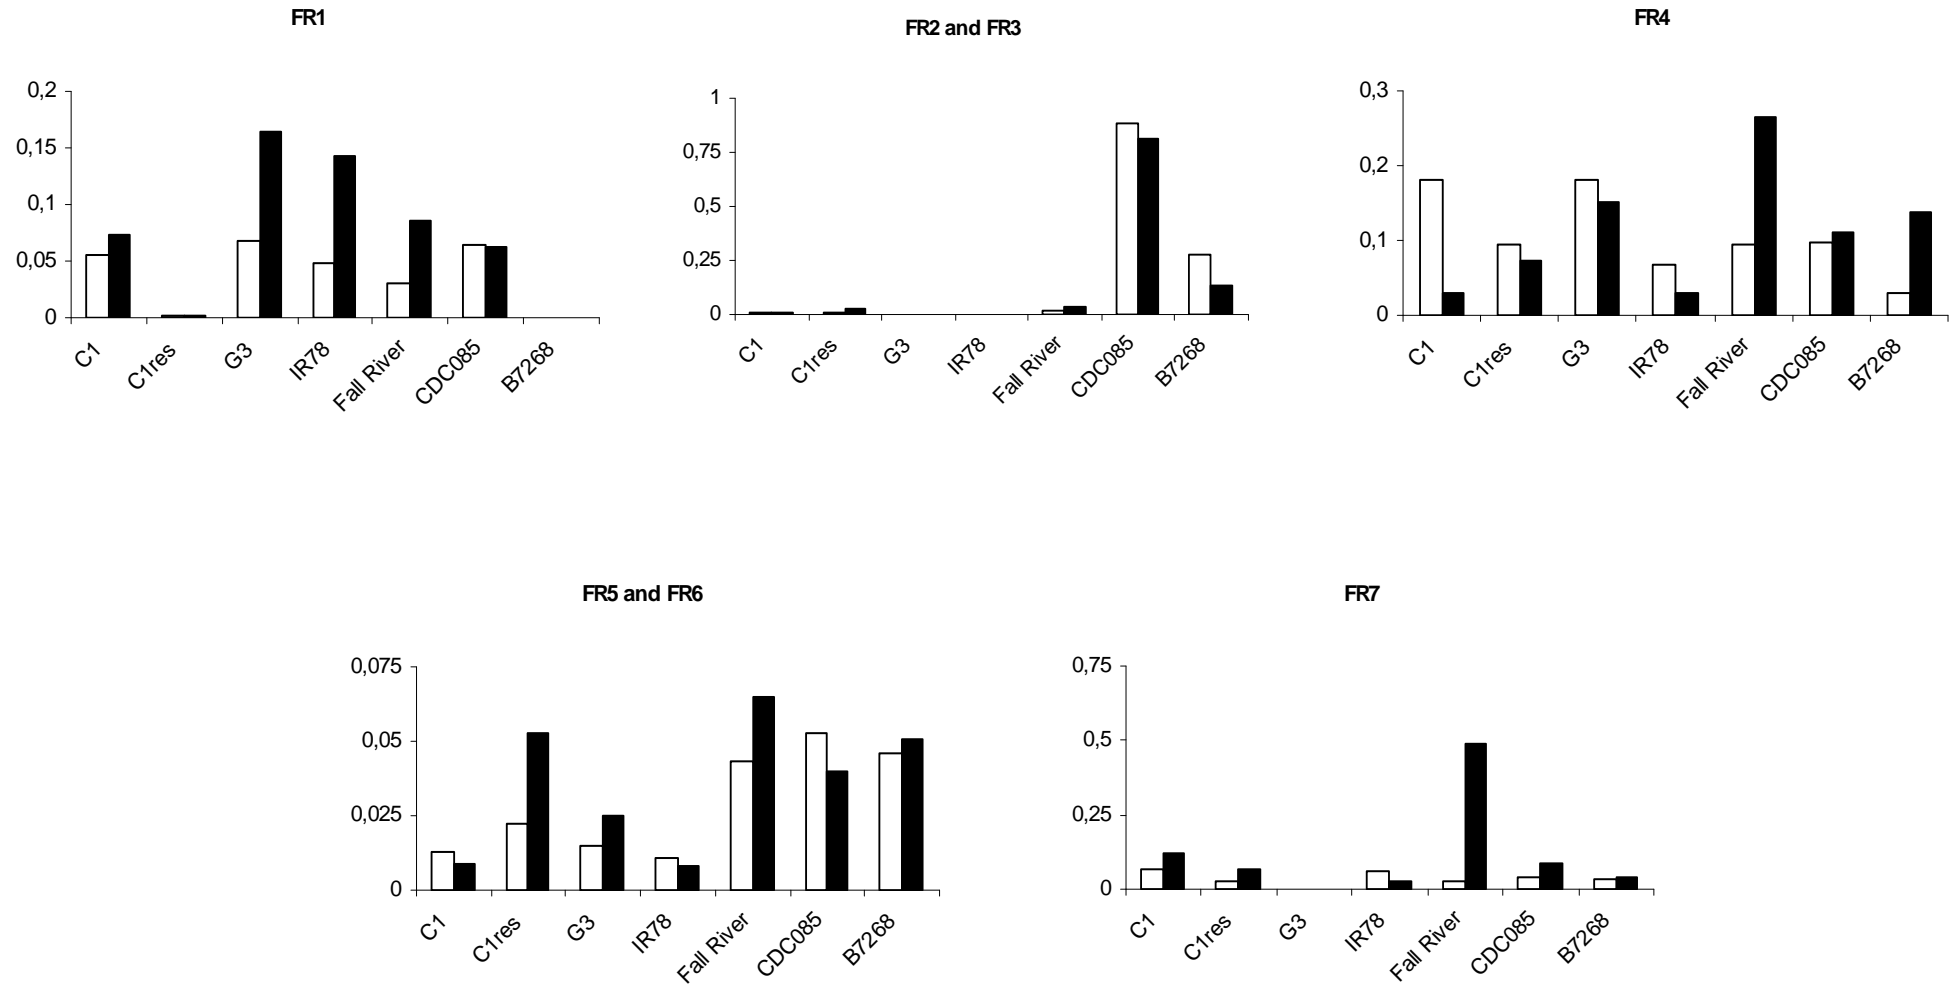

**Figure Legend:**

Expression of all FRs was measured at the mRNA level in strains C1, C1res, G3, IR78, Fall River, CDC085, and B7268. Flavin reductases 2 and 3 and FR5 and 6 were measured with one primer pair each. Levels of mRNA (y-axis) are given as relative abundances (arbitrary units) as compared to cytosolic TrxR mRNA (1 = 100%). White bars: first experiment; black bars: second experiment

**Discussion:**

Since the FR1 antiserum cross-reacted with all FRs, we used quantitative mRNA analyses by RT-qPCR as an alternative strategy to identify the expressed FRs. The following strains were selected for the analysis: C1 and G3 as normally susceptible strains, C1res as a highly metronidazole-resistant cell line of C1 which totally lacks FR activity and expression at the protein level, IR78 which displays reduced expression levels of FRs, Fall River and CDC085 which displays elevated FR levels despite reduced FR activity, and B7268, a metronidazole-resistant isolate which lacks FR activity and expression (Figure 5B). Five primer pairs were designed to measure mRNA levels of all FRs (amplified fragments and primer sequences shown in Supplementary Table 2). Flavin reductases 2 and 3, as well as FR5 and 6 mRNA levels were assessed with one primer pair each; whereas FR 1, 4, and 7 were each measured separately. The gene for cytoplasmic thioredoxin reductase (XM\_001316888) was chosen as the internal standard because it is present as a single copy in the genome and is expressed at similar levels in all strains studied by us so far (Leitsch et al., 2012). Two separate experiments, including RNA isolation, reverse transcription, and qPCR were conducted in duplicate with each strain. Relative abundances of FR mRNAs with standard error of the mean of duplicate measure points are given below. Strikingly, all isoforms of FR were transcribed in all strains tested, with the notable exception of FR1, whose mRNA was virtually absent from C1res and B7268. This result is consistent with the total absence of FR activity in these strains (Figure 1). Further, FR7 mRNA was barely detectable in G3. This isoform was also exceptional in the sense that its mRNA levels in strain Fall River varied almost 15-fold between the two experiments (Figure 5), far exceeding the variation observed for other mRNA, including the internal standard, *i.e.* TrxR mRNA, which was highly reproducible between the two separate experiments and the different strains (see below). This suggests biological rather than technical variation of results. Flavin reductase 2 and 3 mRNAs were 10 to 30 times more abundant in CDC085 than in any other strain, with the exception of B7268 which likewise displayed very high levels. This result was seemingly consistent with the very high levels of alternative FR protein expressed in CDC085 (Figure 5B). However, as B7268 expresses high levels of FR2 and 3 mRNAs with no FR protein detectable in Figure 5B, qRT-PCR of FR mRNA levels does not appear to be an appropriate read-out to compare FR expression between *T. vaginalis* strains.

**Materials and Methods:***Quantitative mRNA analysis by RT-qPCR*

Sets of primers for amplification of all FR genes in RT-qPCR experiments were designed as shown below. The gene for cytosolic thioredoxin reductase (XM\_001316888) was chosen as internal standard because this gene is expressed in all strains analyzed at a comparable rate (Leitsch et al., 2012). All primer pairs were tested on genomic DNA and cDNA from all five strains before RT-qPCR was performed (not

shown). RNA was isolated from *T. vaginalis* cultures using the GeneJET™ RNA purification kit (Fermentas) according to the manufacturer's protocol for "mammalian cultured cells". RNA isolations from one strain for two separate experiments were never conducted on the same day. Contaminating DNA was digested using DNase I (Fermentas) and first-strand cDNA synthesis was performed using the RevertAid™ premium first strand cDNA synthesis kit (Fermentas). Quantitative mRNA analysis was performed in a Roche Light Cycler 480 using the software provided and applying the following program: 95°C, 15 min as denaturation step, and [95°C, 15 sec; 50°C 30 sec; 72°C, 20 sec] × 45 for amplification. Reactions were prepared with FIREPol® EvaGreen® qPCR Mix Plus (Solis Biodyne). Cytosolic thioredoxin reductase (TrxR) mRNA was chosen as standard and analyzed in dilutions of 50, 5, 0.5 and 0.05 ng RNA in volumes of 20 µl each. Only experiments in which the slope between TrxR mRNA dilutions ranged between 3 and 3.4 (3.2 being optimal) were considered. The other analytes were measured applying RNA at a concentration of 50 ng/20 µl. Relative abundances of FR mRNAs were calculated in relation to the abundance of TrxR mRNA.

### Data Source:

Relative abundancies of FR mRNA in relation to TrxR mRNA (± SEM).

#### FR1

| C1             | C1res            | G3             | IR78           | Fall River     | CDC085        | B7268             |
|----------------|------------------|----------------|----------------|----------------|---------------|-------------------|
| 0,055 ± 0,0037 | 0,0012 ± 0,00002 | 0,067 ± 0,0084 | 0,048 ± 0,0083 | 0,031 ± 0,002  | 0,064 ± 0,005 | 0,00022 ± 0,00003 |
| 0,073 ± 0,002  | 0,0015 ± 0,00003 | 0,164 ± 0,004  | 0,143 ± 0,006  | 0,085 ± 0,0003 | 0,063 ± 0,002 | 0,0004 ± 0,000001 |

#### FR4

| C1             | C1res          | G3             | IR78          | Fall River     | CDC085       | B7268          |
|----------------|----------------|----------------|---------------|----------------|--------------|----------------|
| 0,18 ± 0,0057  | 0,095 ± 0,0017 | 0,182 ± 0,009  | 0,068 ± 0,022 | 0,095          | 0,097 ± 0,01 | 0,03 ± 0,007   |
| 0,03 ± 0,00063 | 0,074 ± 0,011  | 0,151 ± 0,0026 | 0,03 ± 0,0033 | 0,264 ± 0,0112 | 0,11 ± 0,068 | 0,137 ± 0,0093 |

#### FR7

| C1             | C1res          | G3                | IR78          | Fall River    | CDC085         | B7268          |
|----------------|----------------|-------------------|---------------|---------------|----------------|----------------|
| 0,07 ± 0,07    | 0,028 ± 0,0006 | 0,00016 ± 0,00016 | 0,06 ± 0,0002 | 0,03 ± 0,0002 | 0,041 ± 0,0013 | 0,032 ± 0,0003 |
| 0,123 ± 0,0343 | 0,068 ± 0,0029 | 0,00064 ± 0,00003 | 0,027 ± 0,001 | 0,486 ± 0,119 | 0,09 ± 0,029   | 0,041 ± 0,0039 |

### FR2 und FR3

| <b>C1</b>        | <b>C1res</b>    | <b>G3</b>          | <b>IR78</b>      | <b>Fall River</b> | <b>CDC085</b> | <b>B7268</b>   |
|------------------|-----------------|--------------------|------------------|-------------------|---------------|----------------|
| 0,0058 ± 0,01    | 0,013 ± 0,00014 | 0,00092 ± 0,00021  | 0,0015 ± 0,00012 | 0,018 ± 0,0026    | 0,883 ± 0,1   | 0,274 ± 0,0058 |
| 0,0045 ± 0,00094 | 0,028 ± 0,003   | 0,00096 ± 0,000003 | 0,0011 ± 0,00012 | 0,035 ± 0,00006   | 0,812 ± 0,023 | 0,133 ± 0,0019 |

### FR5 und FR6

| <b>C1</b>       | <b>C1res</b>   | <b>G3</b>       | <b>IR78</b>     | <b>Fall River</b> | <b>CDC085</b>  | <b>B7268</b>   |
|-----------------|----------------|-----------------|-----------------|-------------------|----------------|----------------|
| 0,013 ± 0,0006  | 0,022 ± 0,0016 | 0,015 ± 0,0018  | 0,011 ± 0,001   | 0,043 ± 0,0015    | 0,053 ± 0,0023 | 0,046 ± 0,0093 |
| 0,0087 ± 0,0005 | 0,053 ± 0,007  | 0,025 ± 0,00009 | 0,0078 ± 0,0015 | 0,065 ± 0,0008    | 0,04 ± 0,0027  | 0,051 ± 0,0009 |

Ct values obtained for TrxR mRNA (internal standard) in two separate experiments in duplicates (four measurements in total):

|            | <b>Ct TrxR mRNA</b> |
|------------|---------------------|
| C1         | 17,23 ± 1,3         |
| C1res      | 18,1 ± 0,64         |
| G3         | 16,01 ± 0,27        |
| IR78       | 16,39 ± 0,15        |
| Fall River | 16,42 ± 0,39        |
| CDC085     | 18,01 ± 0,25        |
| B7268      | 17,42 ± 0,34        |

## Primers used:

|                 | Sequence              | Amplified fragment |
|-----------------|-----------------------|--------------------|
| FR1 forward     | CTTGATGTCTCACATGCACG  | 77 bp              |
| FR1 reverse     | TTGGCTGAATCAGCGAAACG  |                    |
| FR2 + 3 forward | CAGAGCGTGTATTTTCA     | 118 bp             |
| FR2 + 3 reverse | AAGAACATTGGGGCAAC     |                    |
| FR4 forward     | GGTCGCACATCCTGATCC    | 93 bp              |
| FR4 reverse     | CTAACCTCATTTCTGCTG    |                    |
| FR5 + 6 forward | GTTCTTTTCCTCGTCGC     | 84 bp              |
| FR5 + 6 reverse | CTCTAAGGCTGCCTTTGC    |                    |
| FR7 forward     | CAGATTCGCTGATTCAGCTA  | 104 bp             |
| FR7 reverse     | CCTTTGTTGTAAGTGTCTGTC |                    |

## Primers amplify the following stretches of the respective genes (in red; primer sequences in bold):

### FR1:

**CTTGATGTCTCACATGCACG**TCTT**GATCTTAGTTGCTCACCCAGACCCAAACACACAAGGCAACATCATT**  
**CGTTTCG**CTGATTCAGCCAAAGCTGCCCTTGAAGGTGCTGGTCACGAAGTTCGTTACGTCAACTTAATGG  
AAGCTGGCTTCAATCAAACAGCTTCTCAGGATGACTTCAAGACAGTCAACAAGGAACCATTACATAACC  
AGGAAACCAAATGGTTCAGACAATCTTGTGATACAATCAAGGTTCAACAAGAAAACCTCAAGTGGTCT  
ACACACGTTCTTGTTCGCACCACTTTGGTTCGGCCGTCTCCAGCCTGCTTCTATGCTTACACAGAGC  
GTGTTCTTTCTGTTGGATTTCGCTTGGGACTTCCAGCACACATTTGACAAGGCTTTCTTGTGCTGGCCGTAA  
GGTTTCCATCATCGTTTCCGCTGGTTCACCACCAATGTACTTCGATCCAAAGAATGGAAACGGTCTCGAC  
GCTTTCTTTGGTCTGCTATGTACGGTTCAACTATGCTGGTTTCACAATTCTCCGTTCTCTTGGTATCT  
TCGGCGTAATTCCTCAAAGAGAATTTGCTCAACAACCAGAACTCCAGCAGAAGTTCAATGAGAAGTTCTT  
CCAGCTTGACCAGTGGAAAGACAATCGGCACAGAAAAGCTCTACTCCAAGATTGCAGAACTCGAGGAAGTC  
AATTCAGAAAAATCCTCTTTGTAATAATGTGTATTCAATCAAATTAGATAAAAGATTTCGAATATAGATTAAT  
GAAAT

### FR2:

ATGTCATAAAATGCACGTCCTT**GATCTTAGTTGCTCATCCAGATCCAACTCACAAAGCAACTGCCTTCCGCT**  
TCGCAGATTCCTGCCAAAGCTGCTCTTGAAGAAGCTGGTCATGAAGTTAGATATGTTAACTTAATGGAAGC

TGGATTTGATGTCGTTGCCCTCTATGAATGATTTCAAGAGAGTCGAAATGGATCCATTTGAGTATCCTGCA  
AACCAGGCCATTCTGACAATCTCATTGATACAATCAAAGTTCAACAGGAGAATCTCAAGTGGTCAACAC  
ATGTTCTCATCTTTGCTCCACTTTGGTTTGGCCGTCTCCAGCATGCTTTTACTCTTTCT**CAGAGCGTGT**  
**ATTTTCATTTGGATTTCGCCTACGATGGTGAGAGTCCTCTTCATCAAAAATGTCTTTGAAGGGCCGCAAAGTT**  
**GCCATCATTGTTTCAGCAGGAGTTGCCCAATGTTCTT**CGATCCAAAAGAAAGGTAACGGTCTTGATGCTT  
ACTTATGGTCTGCTATGTATGGCTTCAACTATGCAGGCTTCACAATCCTTTCGTTCTCTTGGAATTTATGG  
TGCAAAATTCCTCAAGGAGGAAAAGCAATGCAACCAGAACTTCAAGAAAGATCAATGAAAAACTTCTCAAA  
CTTGATCAATGGAAGACAGTTGATGGTGAAAGAATCTATTCCAATTTTATTAATCTTGAAACAGGTCTTCC  
CTGAAAAATTTCTTAAAGAATGA

### FR3:

ATGTCATAAAATGCACGTCTTGATCTTAGTTGCTCATCCAGATCCAACACACAAAAGCAACTGCATTCCGCT  
TTGCTGACTCAGCAAAGGCAGCTCTTGAAGCAGCAGGCCATGAGGTTAGATATGTTAACTTGATTGAAGA  
AGGTTTTGATGTCAATGCTTCTGCTAAGGATTTCAAGAAAGGTCGAAAACAGATCCATTCAACTACTCAAAT  
AATCAGGGTATTCCTGATAATCTCATTGATACAATCAAAGTTTCAAGCAAGCAAACCTGTTATGGTCAACAC  
ATGTTCTCGTCTTTGCTCCACTTTGGTTTGGCCGTCTCCCGCATGCTTCTACTCCTTTA**CAGAGCGTGT**  
**ATTTTCATTTGGTTTTAGCTATGATGGCGAGAAAGTATTACATCAAGGAGTCCTTGCTGGCCGCAAAGTT**  
**GCGATCATTGTTTTCAACAGGTGTTGCCCAATGTTCTT**TGATGTAAAGAAAGGCAACAGTCTTGATGCAT  
ACTTATGGTCTGCAATGTATGCTTTCAACTACGCTGGATTCACAATCCTTTCGTTCTCTTGACGTTTACGG  
CGCAAATTCCTCAAAGAGAAAAGCAATGCAGCCAGAACTTCAAAAGAAAGATCAATGAAAAACTCCTCAAG  
CTTGATCAATGGAAGACAATTGATGGAGAAAGGATTTACTCCAATTTTGCTTATCTTGAAAGAAGTCACAC  
CAGAAAAATTTCTTAAAGGAGTGA

### FR4:

ATGCGTGTCTTAATATT**GGTCGCACATCTTGATCCA**ACTCATGAAGCTACATCATTTAGGTTTCGCTTTGT  
**CTGCAAAGGCAGCACTTGAGGCAGCAGGAAATGAGGTTAG**ATATGTAAATTTAATTGCAGAAGGCTTTGA  
CAAAGCTGGCTCCGCTGGAGACTTCAAGCAATTGAAAACAGATCCATTTACATACGATGGAAAACCAAATG  
ATCAAAGATAATCTGATCGATTGCATCAAAGTTCAACAAGAAAATTTACTTTGGTCAACTCATGTAGTCA  
TCTTCGCACCTCTTTGGTTTGGAAAGACTTCCATCATGCTTTTACTGCTACACAGAGCGTGTCTTTCTTT  
CCCATTTGCTTATGATTACGAAAACTACATAGAGAAAAGGATTTCTTAAAGGCAGAAAAGTAACATCAATC  
ATATCAACAGGAGTAGATTCTGTCATTCTTTGATCCAAAAGAACGAAAATACATTGGATGCTTATGCATGGT  
CAGCAATGTATGGATTTCGATTACTCTGGATTTACGATACTCCGTTCTCTAGGCATATATAGCGCAGTTGT  
TCCAGAGATGATCAAAACAACAGCCTGAACTCATGAAAAAGATTAACGAAAAAATCGTTAAGCTCGATCAG  
TGGAAGACTGTTGGAAGCAACAAATGCTTTAACGCATTATGCTCTCTCGAAGAAGTTACCCCGATAACA  
TTCTCGTTAGTGAATAA

FR5:

ATGCGC**GTTCTTTTCCTCGTCGCACACGTTGACCCAAACACACAAGGCAACAGCATTTCAGATTTCGCAGACT**  
CA**GCAAAGGCAGCCTTAGAG**AAGGCAGGCCACGAAGTCAGGTACGTTAACCTCGTCGAGTCTGGTTTCGA  
CAGAACATTTGACAACAAAGGACTTCAAGAAGATCCAGATGGCACATTCTCAATCTTCGCAGTCACAGGC  
CAAGACAACCTTGGTTGACGAGATCAAAGTCCAACAAGAGAACCTCAAGTGGGCAACACACGTTGTCTATCT  
TCGCCCAATGTGGTACGGCAGATTCCCATCATGCGTCTACGCATACACAGAGAGAGTTCTCAACGTTCC  
ATTTGCTTGGGACTTCGAACACATGCTCGACAAGGGCTACCTCGCTGGCAAGAAGGTCACATCCGTCATC  
TCCACAGGCAGTGCACCAATGTTCTTCGATCCTAAGGAAGGCAACGGCCTCGACGCATACACATGGAGCG  
CCCTCTACGCTTTCAACTACTCCGGCTTCACAATCCTCAGATCAATCGGCATCCACGGTGCAAACCTCACC  
AAAGAGAATTTGCCATGCAACCAGAACTCCAGCAGAAGCTCAACGAGAAGCTCTTTGAACCTCGACAACCTGG  
AAGGTCATCACAGACAAGAAGTTTGTTCCTACTCGCAACACTCGACCAAATCACTGAACTGAAAACTTGA  
TTCAATAA

FR6:

ATGCGT**GTTCTTTTCCTCGTCGCGCATGTTGATCCAACACACAAGGCAACAGCTTTTCAGATTTGCTGACT**  
**CCGCAAAGGCAGCCTTAGAG**AAGGCTGGCCATGAAAGTCAGATACGTTAACCTCGTTGAGTCTGGCTTTGA  
CAGAACATTTGACAGCCAAGGACTTCAAGAAGATCCAGATGGCACATTCTCAATCTTCGCAGTTACAGGC  
CAAGACAACCTTGATTGATGAAATCAAGGTCCAGCAAGAGAATCTCAAGTGGGCAACACACGTTGTCTATCT  
TCGCCCAATGTGGTACGGCAGATTCCCATCATGCGTCTATGCATATACAGAGAGAGTTCTCAACGTTCC  
ATTTGCTTGGGACTTCGAGCACATGCTCGACAAGGGCTATCTCGCCGGCAAGAAGGTTACATCTGTAATC  
TCTACAGGCAGTGCACCAATGTTCTTCGATCCTAAGGAAGGAAACGGCCTTGATGCTTACACATGGAGTG  
CTCTCTACGCTTTCAACTACTCTGGCTTCACAATCCTCAGATCAATCGGTATTCATGGCGCAAACCTCACC  
AAAGAGAATTTGCCATGCAGCCAGAACTTCAGCAGAAGCTCAACGATAAGCTTTTGAACCTCGATAACTGG  
AAGGTCATCACAGACAAGAAGTTTGTTCCTACTTGCCACACTTGACCAAATCACAGATCCAGAAAACTTGA  
TCCAATAA

FR7:

ACTTTTAACAATGCGCGTTCCTTTTCCTTTGTCGCACACGTTGACCCAAACACACAAGGCCACAGCATT**CAGA**  
**TTTCGCTGATTTCAGCTAAGAAAGCCTTAGAAGAGGCAGGACACGAAGTTAGATACGTAAATTTAGTTGAAT**  
**CTGGTTTTCACAGAACACTTACAACAAGG**ACTTCAAGAAGGTTCCAGAAGGCCAATTCAATATCTTTGC  
TCTTACAGGCCAAGAAAACTTAGTCGATGAAAGTTAAGGTTTCAGCAAGAAAACTCAAATGGGCAACACAT  
GTTGTCTATCTTACACCAATGTGGTATGGCAGATTTCCATCCTGCGTTTACGCATACACAGAGAGAGTTTC  
TCAACGTTCCATTACCTGGGACTTTGAACATATGCTCGAGAAGGGCTATCTTGGCCGGCAAGAAGGTCAC  
ATCTATCATTTCTACAGGCAGTGCACCAATGTTCTTTGATCCAAGCAAGGAAATGGCCTTGATGCCTAC

GCATGGAGCGCTCTTTACGCTTTCAACTATTCTGGCTTTACAATTCTTAGATCTATTGGTATCCATGGTG  
CTAATTCTCCAAAGAGAATTGAACAACAGCCAGAACTTCAGAAGAACTCAACCAACAACCTCTTAATCT  
TGACAACTGGAAAGTAATCACAGATAAGAAGATGGGACCACTTGCTACATTAGATCAAATCACAGAACCA  
GAAAACCTTATTCAATAA



## Supplementary Figure 2

CTTCATGCTCTCACATGCACGTCTTGATCTTAGTTGCTCACCCAGACCCAACACACAAGGCAACATCATTCGGTTT  
CGCTGATTTCAGCCAAAGCTGCCCTTGAAGGTGCTGGTCACGAAGTTCGTTACGTCAACTTAATGGAAGCTGGCTT  
CAATCAAACAGCTTCTCAGGATGACTTCAAGACAGTCAACAAGGAACCATTACATAACCCAGGAAACCAAATGGT  
TCCAGACAATCTTGTTGATAAATCAAGGTTCAACAAGAAAACCTCAAGTGGTCTACACACGTTCTTGTTCGCTG  
ACCACTTTGGTTTCGGCCGTCTCCAGCCTGCTTCTATGCTTACACAGAGCGTGTCTTCTGTTGGATTTCGCTG  
GGACTTCCAGCACACATTTGACAAGGCTTTCTTTGCTGGCCGTAAGGTTTCCATCATCGTTTCCGCTGGTTCACC  
ACCAATGTACTTCGATCCAAAGAATGGAAACGGTCTCGACGCTTTCTTTGGTCTGCTATGTACGGTTTCAACTA  
TGCTGGTTTCACAATTCTCCGTTCTCTTGGTATCTTCGGCGCTAATTCTCCAAAGAGAATTGCTCAACAACCAGA  
ACTCCAGCAGAAGTTCAATGAGAACTTCCTCCAGCTTGACCAGTGAAGACAATCGGCACAGAAAAGCTCTACTC  
CAAGATTGCAGAACTCGAGGAAGTCAATTCAGAAAACATCCTCTTGTAAATGTGTATTCAATCAAATTAGATAA  
AGATTCGAATATAGATTAATG

**Structure of the FR1 gene in all strains tested.** The start codon on the mRNA is preceded by four bases only (green background). The 3'UTR after the stop codon (in bold) is 47 bases long (light blue background). The T highlighted in red (T<sub>95</sub>) is mutated to an A in strain LA1 without effect on the amino acid sequence. The G highlighted in dark blue (G<sub>609</sub>) is mutated to a T in C1 (and C1res) and B7268, leading to an exchange of alanine to valine.

### Supplementary Figure 3

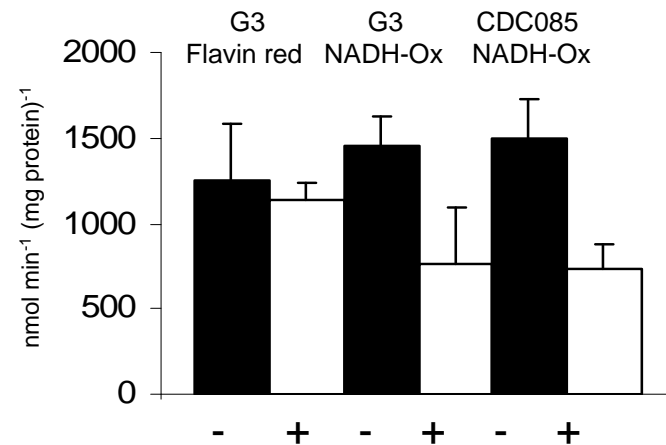

NADH-oxidase activity was measured in *T. vaginalis* G3 (metronidazole-sensitive) and CDC085 (metronidazole-resistant), either untreated (-) or treated (+) with 200  $\mu\text{M}$  metronidazole for two hours. Cells had been incubated in cysteine-free medium in order to guarantee elevated oxygen levels. For comparison, also flavin reductase activity was measured in G3, either in absence (-) or presence (+) of metronidazole (200  $\mu\text{M}$ , 2h). All measurements were repeated at least twice. Bars indicate SEM.

**Supplementary Table 1:**

Proteins identified by RP-LC/MS/MS. Flavin reductase 1 is highlighted in red.

| No. | Accession    | Name                                                                                        | MW [kDa] | Meta Score | Peptides | SC [%] |
|-----|--------------|---------------------------------------------------------------------------------------------|----------|------------|----------|--------|
| 1   | gi 123428711 | lactate dehydrogenase family protein [Trichomonas vaginalis G3]                             | 37.1     | 756,61     | 12       | 35.7   |
| 2   | gi 123425265 | Clan MH, family M20, peptidase T-like metallopeptidase [Trichomonas vaginalis G3]           | 51.3     | 598,70     | 9        | 24.1   |
| 3   | gi 123444869 | actin [Trichomonas vaginalis]                                                               | 40.7     | 416,77     | 7        | 21.9   |
| 4   | gi 123473909 | ribosomal protein L5 [Trichomonas vaginalis G3]                                             | 34.8     | 416,20     | 7        | 28.6   |
| 5   | gi 123365845 | Flavodoxin-like fold family protein [Trichomonas vaginalis G3]                              | 27.0     | 333,38     | 6        | 34.3   |
| 6   | gi 123439029 | ribosomal protein [Trichomonas vaginalis G3]                                                | 28.4     | 282,39     | 4        | 25.5   |
| 7   | gi 123431388 | L-lactate dehydrogenase [Trichomonas vaginalis G3]                                          | 37.0     | 280,70     | 2        | 9.3    |
| 8   | gi 123435358 | Ser/Thr protein phosphatase [Trichomonas vaginalis G3]                                      | 35.1     | 275,98     | 3        | 11.4   |
| 9   | gi 311303090 | putative actin depolymerizing factor [Trichomonas vaginalis]                                | 14.5     | 202,21     | 4        | 35.7   |
| 10  | gi 123502962 | dTDP-4-dehydrorhamnose 3,5-epimerase family protein [Trichomonas vaginalis G3]              | 38.9     | 132,10     | 2        | 7.2    |
| 11  | gi 154413806 | Serine/threonine protein phosphatase PP1-gamma catalytic subunit [Trichomonas vaginalis G3] | 44.7     | 117,08     | 2        | 7.7    |
| 12  | gi 123447599 | hypothetical protein [Trichomonas vaginalis G3]                                             | 49,4     | 106,57     | 2        | 6,2    |

**Abbreviations:**

SC: Sequence coverage

Meta Score: calculated Score

MW: calculated molecular weight based on the database sequence

## Supplementary Table 2:

Primers used for cloning of flavin reductases 1 – 7. Restriction sites are given in red letters, stop codons in blue letters, and 6 x His-tags in green letters. The mutation site in FR7 is given in bold against red background.

|                              |                                                                                             |
|------------------------------|---------------------------------------------------------------------------------------------|
| Flavin reductase 1 forward   | TACGTACG <b>CATATG</b> TCTCACATGCACGTCTTGATC                                                |
| Flavin reductase 1 reverse   | TCATCCAG <b>GAATTC</b> <b>TTA</b> GTGATGGT <b>GATGGT</b> GATGCAAGAGGATGTTTTCTGAATTGACTTC    |
| Flavin reductase 2 forward   | TACGTACG <b>CATATG</b> TCTAAAATGCACGTCTTGATCTTAG                                            |
| Flavin reductase 2 reverse   | TCATCCAG <b>CTCGAG</b> <b>TTA</b> GTGATGGT <b>GATGGT</b> GATGTTCTTTAAGAATGTTTTCAGGGAAGACC   |
| Flavin reductase 3 forward   | TACGTACG <b>CATATG</b> TCTAAAATGCACGTCTTGATCTTAG                                            |
| Flavin reductase 3 reverse   | TCATCCAG <b>CTCGAG</b> <b>TTA</b> GTGATGGT <b>GATGGT</b> GATGCTCCTTAAGAATATTTTTCTG GTGTGAC  |
| Flavin reductase 4 forward   | TACGTACG <b>CATATG</b> CGTGTCTTAATATTGGTCGCAC                                               |
| Flavin reductase 4 reverse   | TCATCCAG <b>CTCGAG</b> <b>TTA</b> GTGATGGT <b>GATGGT</b> GATGTTCACTAACGAGAATGTTATCGGG       |
| Flavin reductase 5 forward   | TACGTACG <b>CATATG</b> CGCGTTCTTTTCCTCGTCGC                                                 |
| Flavin reductase 5 reverse   | TCATCCAG <b>CTCGAG</b> <b>TTA</b> GTGATGGT <b>GATGGT</b> GATGTTGAATCAAGTTTTCAGGTTCAAGTG     |
| Flavin reductase 6 forward   | TACGTACG <b>CATATG</b> CGTGTCTTTTCCTCGTCGCGC                                                |
| Flavin reductase 6 reverse   | TCATCCAG <b>CTCGAG</b> <b>TTA</b> GTGATGGT <b>GATGGT</b> GATGTTGGATCAAGTTTTCTGGATCTGTGATTTG |
| Flavin reductase 7 forward   | TACGTACG <b>GGATTC</b> CGCGTTCTTTTCCTTGTCGCAC                                               |
| Flavin reductase 7 reverse   | TCATCCAG <b>GAATTC</b> <b>TTA</b> GTGATGGT <b>GATGGT</b> GATGTTGAATAAGGTTTTCTGGTTCTGTG      |
| Flavin reductase 7 Mut fwd   | CGTTCCATTCACCTGGGACTTTGAACA <b>C</b> ATGCTCGAGAAGGGCTATCTTGCCGGC                            |
| Flavin reductase 7 Mut rev   | GCCGGCAAGATAGCCCTTCTCGAGCAT <b>G</b> GTGTTCAAAGTCCCAGGTGAATGGAACG                           |
| Flavin reductase 7 forward 2 | TACGTACG <b>CATATG</b> CGCGTTCTTTTCCTTGTCGCAC                                               |
